# Supplementary material for: Microlitre scale solution processing for controlled, rapid fabrication of chemically derived graphene thin films
Source: Royal Society of Chemistry journal article supplement (doi:10.1039/c2jm15299a), 2012-01-01
Supplement: c2jm15299a.pdf [file c2jm15299a.pdf]

*Supplementary Information*

# **Microliter-Scale Solution Processing for Controlled, Rapid Fabrication of Chemically Derived Graphene Thin Films**

*Young Un Ko, Sung-rheb Cho, Kyoung Soon Choi, Yensil Park, Sung Tae Kim, Nam Hee Kim,  
Soo Young Kim, and Suk Tai Chang\**

School of Chemical Engineering and Materials Science, Chung-Ang University

221 Heukseok-dong, Dongjak-gu, Seoul 156-756, Republic of Korea

\*E-mail: stchang@cau.ac.kr

**Two movies visualizing the MDD coating process are provided (in AVI format):**

■ **Movie1\_MDD\_Coating\_Glass.avi**

This movie shows the meniscus-dragging deposition (MDD) of the GO thin film on a glass slide with a GO concentration of  $2.4 \text{ mg mL}^{-1}$ . The coating area of the GO film is  $2.5 \times 5.0 \text{ cm}^2$ . The deposition velocity and deposition angle are  $10 \text{ mm sec}^{-1}$  and  $30^\circ$ , respectively. The movie is recorded with Panasonic Lumix DMC-LX5 digital camera.

■ **Movie2\_MDD\_Coating\_PET\_Large\_Area.avi**

This movie shows the meniscus-dragging deposition (MDD) of the large-area GO thin film on a PET with a GO concentration of  $2.4 \text{ mg mL}^{-1}$ . The coating area of the GO film is  $25 \times 10 \text{ cm}^2$ . The deposition velocity and deposition angle are  $10 \text{ mm sec}^{-1}$  and  $30^\circ$ , respectively. The movie is recorded with Panasonic Lumix DMC-LX5 digital camera.

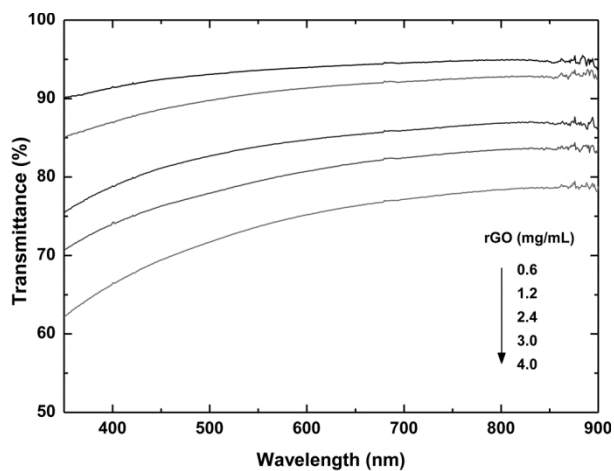

**Figure S1.** Transmission spectra of reduced GO thin films on glass slides at various deposition concentrations. The reduced GO films are deposited at the DN = 20 and deposition speed of 10 mm sec<sup>-1</sup>, followed by HI acid vapor reduction for 3 h at 80 °C.

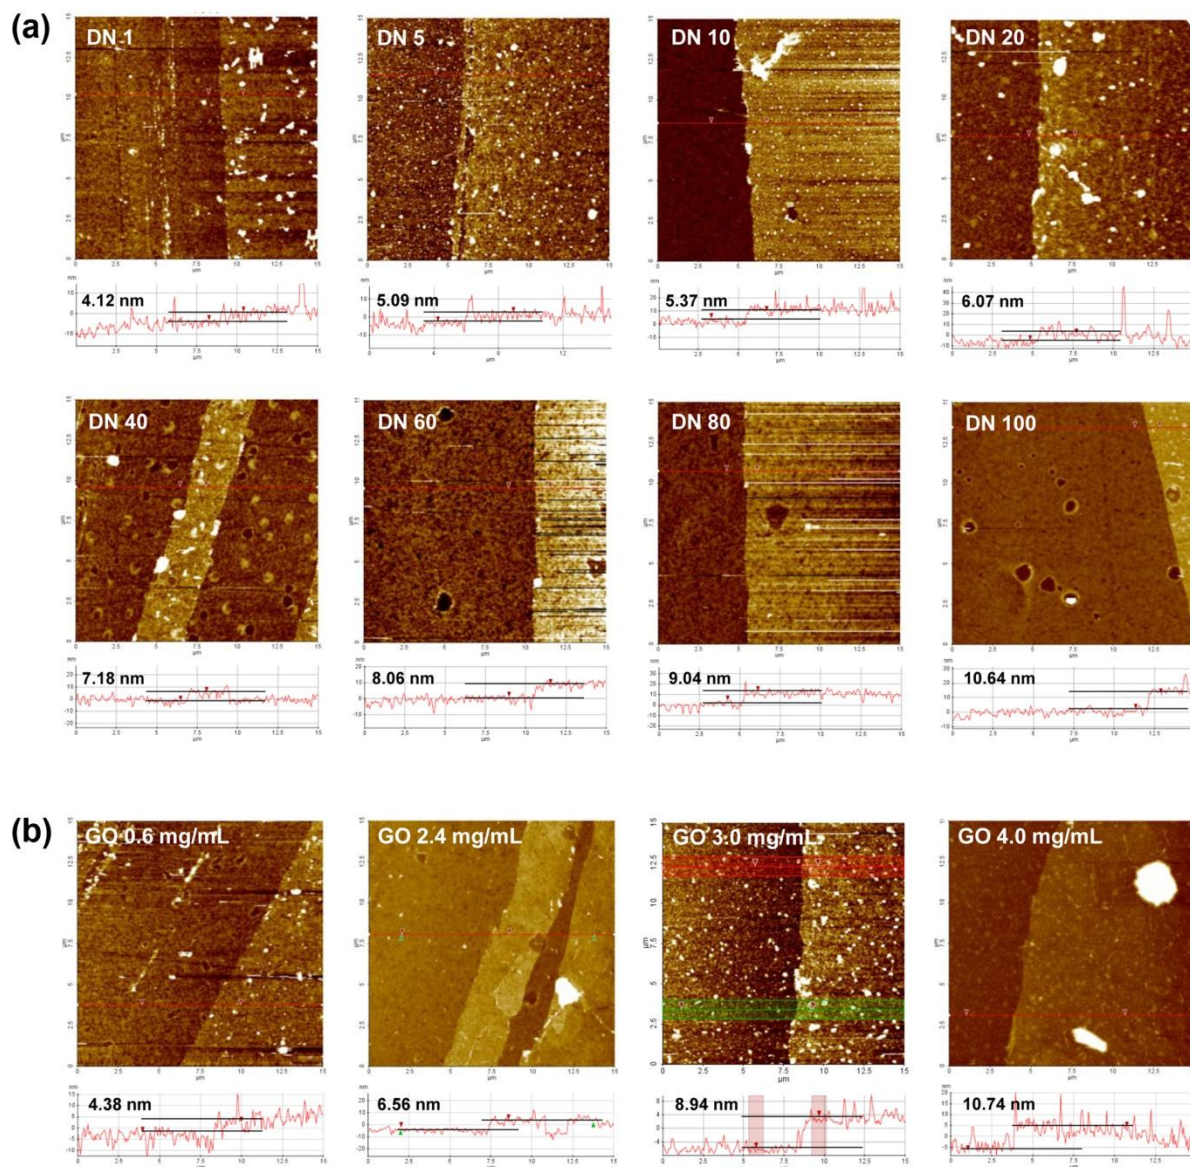

**Figure S2.** AFM images and height profiles of the rGO thin films on a glass slide (a) at different deposition numbers with a GO concentration of 2.4 mg mL<sup>-1</sup> and (b) with various GO concentrations at DN = 20. All of the reduced GO films were deposited with a deposition velocity of 10 mm sec<sup>-1</sup> and deposition angle of  $\theta = 30^\circ$ , followed by HI acid vapor reduction for 3 h at 80 °C. The images are for 15×15 μm regions.

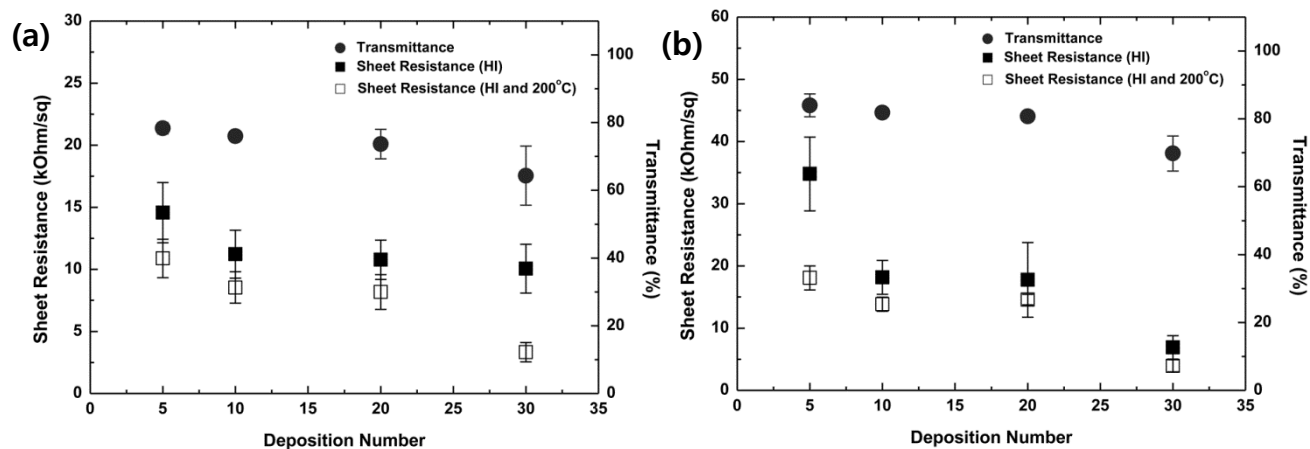

**Figure S3.** Electrical and optical properties of the rGO thin films deposited on glass slides at DN 20. Sheet resistance and transmittance at  $\lambda = 550$  nm as a function of deposition concentration, (a) 3.0 mg mL<sup>-1</sup> and (b) 4.0 mg mL<sup>-1</sup>. The deposition velocity and deposition angle ( $\theta$ ) for the reduced GO thin film coatings are 10 mm sec<sup>-1</sup> and 30°, respectively.

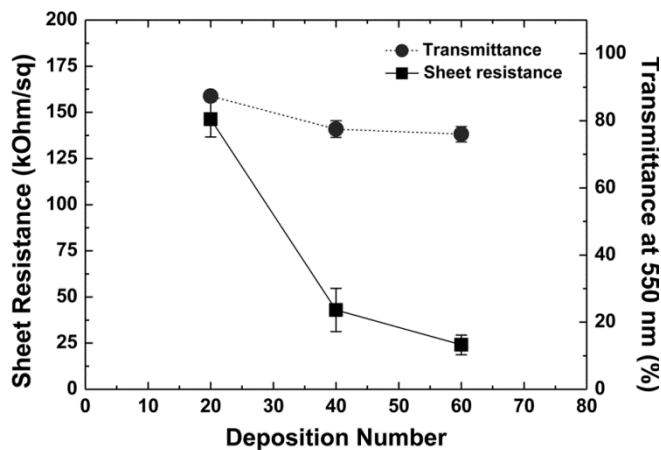

**Figure S4.** Electrical and optical properties of the rGO thin films deposited on PET with a GO concentration of 2.4 mg mL<sup>-1</sup>. Sheet resistance and transmittance at  $\lambda = 550$  nm as a function of deposition number. The deposition velocity and deposition angle ( $\theta$ ) for the reduced GO thin film coatings are 10 mm sec<sup>-1</sup> and 30°, respectively.
